# Supplementary material for: Long-term response to gluten-free diet as evidence for non-celiac wheat sensitivity in one third of patients with diarrhea-dominant and mixed-type irritable bowel syndrome
Source: PubMed Central journal article supplement (PMC5219884; doi:10.1007/s00384-016-2663-x), 2016-09-30
Supplement: 384_2016_2663_MOESM1_ESM.pdf [file 384_2016_2663_MOESM1_ESM.pdf]

## SUPPLEMENTARY MATERIAL

### Results of the IBS-QoL subscales

**Supplementary Table 1: Responder 75 before and after four months of GFD**

| IBS-QoL subscale                  | Before GFD<br>(n=11) | After GFD<br>(n=9) | P            |
|-----------------------------------|----------------------|--------------------|--------------|
| <b>Dysphoria</b>                  | <b>44.4±20.5</b>     | <b>81.6±23.6</b>   | <b>0.008</b> |
| <b>Interference with activity</b> | <b>48.4±11.6</b>     | <b>77.1±16.3</b>   | <b>0.008</b> |
| <b>Body image</b>                 | <b>44.9±23.0</b>     | <b>81.9±19.1</b>   | <b>0.008</b> |
| <b>Health worry</b>               | <b>65.9±16.4</b>     | <b>88.3±11.9</b>   | <b>0.012</b> |
| Food avoidance                    | 33.3±28.6            | 44.2±24.3          | n.s.         |
| <b>Social reaction</b>            | <b>56.3±27.8</b>     | <b>76.9±24.6</b>   | <b>0.028</b> |
| sexual                            | 70.5±32.7            | 86.1±18.6          | n.s.         |
| relationships                     | 67.4±27.0            | 81.3±17.2          | n.s.         |
| <b>total</b>                      | <b>51.1±16.3</b>     | <b>77.6±16.4</b>   | <b>0.011</b> |

**Supplementary Table 2: Non-responder 75 before and after four months of GFD**

| IBS-QoL subscale                  | Before GFD<br>(n=17) | After GFD<br>(n=17) | P            |
|-----------------------------------|----------------------|---------------------|--------------|
| <b>Dysphoria</b>                  | <b>39.5±21.8</b>     | <b>59.0±29.5</b>    | <b>0.003</b> |
| <b>Interference with activity</b> | <b>51.5±28.5</b>     | <b>64.5±30.3</b>    | <b>0.020</b> |
| <b>Body image</b>                 | <b>52.9±21.7</b>     | <b>71.1±25.9</b>    | <b>0.012</b> |
| Health worry                      | 59.1±25.6            | 67.9±19.2           | n.s.         |
| Food avoidance                    | 40.0±33.2            | 44.6±24.6           | n.s.         |
| <b>Social reaction</b>            | <b>50.6±24.0</b>     | <b>64.6±28.3</b>    | <b>0.005</b> |
| sexual                            | 75.0±25.8            | 79.4±21.6           | n.s.         |
| relationships                     | 57.8±30.4            | 72.1±25.7           | n.s.         |
| <b>total</b>                      | <b>50.4±21.0</b>     | <b>64.2±23.1</b>    | <b>0.025</b> |

**Supplementary Table 3: Responder (R75) versus Non-responder 75 (NR75) after four months of GFD**

| IBS-QoL subscale           | R75<br>(n=9)     | NR75<br>(n=17)   | P            |
|----------------------------|------------------|------------------|--------------|
| <b>Dysphoria</b>           | <b>81.6±23.6</b> | <b>59.0±29.5</b> | <b>0.049</b> |
| Interference with activity | 77.1±16.3        | 64.5±30.3        | n.s.         |
| Body image                 | 81.9±19.1        | 71.1±25.9        | n.s.         |
| <b>Health worry</b>        | <b>88.3±11.9</b> | <b>67.9±19.2</b> | <b>0.008</b> |
| Food avoidance             | 44.2±24.3        | 44.6±24.6        | n.s.         |
| Social reaction            | 76.9±24.6        | 64.6±28.3        | n.s.         |
| sexual                     | 86.1±18.6        | 79.4±21.6        | n.s.         |
| relationships              | 81.3±17.2        | 72.1±25.7        | n.s.         |
| total                      | 77.6±16.4        | 64.2±23.1        | n.s.         |

**Supplementary Table 4: Responder 50 before and after four months of GFD**

| IBS-QoL subscale                  | Before GFD<br>(n=17) | After GFD<br>(n=16) | P            |
|-----------------------------------|----------------------|---------------------|--------------|
| <b>Dysphoria</b>                  | <b>47.3±20.0</b>     | <b>83.6±19.4</b>    | <b>0.001</b> |
| <b>Interference with activity</b> | <b>54.4±22.2</b>     | <b>81.7±15.0</b>    | <b>0.001</b> |
| <b>Body image</b>                 | <b>48.2±20.6</b>     | <b>85.2±15.3</b>    | <b>0.001</b> |
| <b>Health worry</b>               | <b>66.2±21.5</b>     | <b>82.3±17.4</b>    | <b>0.024</b> |
| Food avoidance                    | 40.2±34.6            | 47.4±20.3           | n.s.         |
| <b>Social reaction</b>            | <b>58.1±25.1</b>     | <b>79.7±20.6</b>    | <b>0.004</b> |
| sexual                            | 74.3±31.7            | 89.2±18.2           | n.s.         |
| relationships                     | 67.2±27.6            | 82.6±16.5           | n.s.         |
| <b>total</b>                      | <b>54.5±19.0</b>     | <b>79.8±13.9</b>    | <b>0.001</b> |

**Supplementary Table 5: Non-responder 50 before and after four months of GFD**

| IBS-QoL subscale           | Before GFD<br>(n=11) | After GFD<br>(n=11) | P    |
|----------------------------|----------------------|---------------------|------|
| Dysphoria                  | 32.3±20.2            | 43.8±23.9           | n.s. |
| Interference with activity | 43.8±24.0            | 51.0±28.9           | n.s. |
| Body image                 | 52.3±25.2            | 60.4±26.3           | n.s. |
| Health worry               | 54.9±22.9            | 65.5±18.1           | n.s. |
| Food avoidance             | 33.0±25.6            | 40.2±28.1           | n.s. |
| Social reaction            | 44.7±24.4            | 53.8±28.1           | n.s. |
| sexual                     | 71.6±23.1            | 71.6±22.4           | n.s. |
| relationships              | 53.0±30.4            | 65.2±27.8           | n.s. |
| total                      | 44.8±18.1            | 53.7±21.1           | n.s. |

**Supplementary Table 6: Responder (R50) versus Non-responder 50 (NR50) after four months of GFD**

| IBS-QoL subscale                  | R50<br>(n=16)    | NR50<br>(n=11)   | P            |
|-----------------------------------|------------------|------------------|--------------|
| <b>Dysphoria</b>                  | <b>83.6±19.4</b> | <b>43.8±23.9</b> | <b>0.000</b> |
| <b>Interference with activity</b> | <b>81.7±15.0</b> | <b>51.0±28.9</b> | <b>0.008</b> |
| <b>Body image</b>                 | <b>85.2±15.3</b> | <b>60.4±26.3</b> | <b>0.010</b> |
| <b>Health worry</b>               | <b>82.3±17.4</b> | <b>65.5±18.1</b> | <b>0.030</b> |
| Food avoidance                    | 47.4±20.3        | 40.2±28.1        | n.s.         |
| <b>Social reaction</b>            | <b>79.7±20.6</b> | <b>53.8±28.1</b> | <b>0.013</b> |
| <b>sexual</b>                     | <b>89.2±18.2</b> | <b>71.6±22.4</b> | <b>0.026</b> |
| relationships                     | 82.6±16.5        | 65.2±27.8        | n.s.         |
| <b>total</b>                      | <b>79.8±13.9</b> | <b>53.7±21.1</b> | <b>0.003</b> |

All data are given as mean±SD. P< 0.05 was considered significant.
